# Supplementary material for: Characteristic of Uterine Rhabdomyosarcoma by Algorithm of Potential Biomarkers for Uterine Mesenchymal Tumor
Source: Preprints.org preprint supplement (doi:10.20944/preprints202203.0091.v1), 2022-03-07
Supplement: Supplementary file 3 [file supplementary]

**Conflicts of interest**

**The material (manuscript and figure) is original research, has not been previously published and has not been submitted for publication elsewhere while under consideration.**

**Disclosure of potential conflicts of interest:**

**The authors declare no potential conflicts of interest.**
