# Supplementary material for: Characteristic of Uterine Rhabdomyosarcoma by Algorithm of Potential Biomarkers for Uterine Mesenchymal Tumor
Source: Preprints.org preprint supplement (doi:10.20944/preprints202203.0091.v1), 2022-03-07

## CERTIFICATE OF EDITING

This is to certify that the paper titled **NA** commissioned to us by **Takuma Hayashi** has been edited for English language, grammar, punctuation, and spelling by Enago, the editing brand of Crimson Interactive Pvt. Ltd under Normal Editing B2C.

✓ **ISO 17100:2015**  
Translation Service  
Providers

✓ **ISO 27001:2013**  
Information Security  
Management System

✓ **ISO 9001:2015**  
Quality Management  
System

Issued by:  
**Enago, Crimson Interactive Pvt. Ltd.**  
1001, Techniplex-II, S. V. Road,  
Goregaon (W), Mumbai 400062, India.  
Phone: 03-5050-5374  
Fax: 03-4496-4934

**Disclaimer:** The intent of the author's message has been preserved during the editing process. The author is free to accept or reject our changes in the document after reviewing our edits. This certificate has been awarded at the time of sharing the final edited version (full file or sections of the file) with the author. Enago does not bear any responsibility for any alterations done by the author to the edited document post **26 Feb 2022**.

**Japan** www.enago.jp, www.ulatus.jp, www.voxtab.jp  
**Taiwan** www.enago.tw, www.ulatus.tw  
**China** www.enago.cn, www.ulatus.cn  
**Brazil** www.enago.com.br, www.ulatus.com.br  
**Germany** www.enago.de

**Russia** www.enago.ru  
**Arabic** www.enago.ae  
**Turkey** www.enago.com.tr  
**S. Korea** www.enago.co.kr  
**Global** www.enago.com, www.ulatus.com, www.voxtab.com

**About Crimson:**  
Crimson Interactive pvt ltd is one of the world's leading academic research support services. Since 2005, we've supported over 2 million researchers in 125 countries with their publication goals.

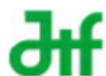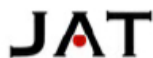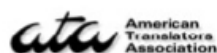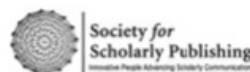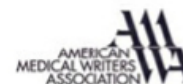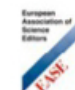

Supplement: Supplementary file 4 [file supplementary]
